# Supplementary material
Source: HighWire-hosted journal article supplement (https://www.rcpjournals.org/highwire/filestream/10996/field_highwire_adjunct_files/2/Wingfield_Supplementary_S3.pdf)
Supplement: Wingfield_Supplementary_S3.pdf [file Wingfield_Supplementary_S3.pdf]

**Supplementary material S3: Patient demographic data, clinical syndromes, advice given, and outcome overall and by returning traveller status.**

|                                                     | Overall<br>(n=360)* | No history of<br>foreign travel<br>(n=204) | Returned<br>Traveller<br>(n=156) |
|-----------------------------------------------------|---------------------|--------------------------------------------|----------------------------------|
|                                                     | n (%)               | n (%)                                      | n (%)                            |
| <b>Patient demographic data</b>                     |                     |                                            |                                  |
| <i>Age in years (n=348); median (IQR)</i>           | 43 (29-56)          | 47 (34-63)                                 | 36 (25-51)                       |
| <i>Male sex; mean (SD)</i>                          | 56 (50)             | 120 (59)                                   | 83 (53)                          |
| <i>HIV positive</i>                                 | 35 (9.7)            | 31 (15)                                    | 4 (2.5)                          |
| <i>Chronic hepatitis</i>                            | 9 (2.5)             | 8 (3.9)                                    | 1 (0.6)                          |
| <i>Non-HIV immunosuppression</i>                    | 27 (7.5)            | 24 (12)                                    | 3 (2)                            |
| <i>Known to TIDU**</i>                              | 18 (5.0)            | 17 (8.3)                                   | 1 (0.6)                          |
| <b>Patient Clinical Syndrome</b>                    |                     |                                            |                                  |
| <i>Localised infection</i>                          | 171 (48)            | 133 (66)                                   | 38 (24)                          |
| <i>Fever in returned traveller</i>                  | 92 (26)             | 0 (0)                                      | 92 (60)                          |
| <i>Rash</i>                                         | 34 (9)              | 17 (8)                                     | 17 (11)                          |
| <i>PUO</i>                                          | 27 (7.5)            | 26 (13)                                    | 1 (0.5)                          |
| <i>PEP/Needlestick</i>                              | 15 (4)              | 14 (6.5)                                   | 1 (0.5)                          |
| <i>New diagnosis HIV</i>                            | 11 (3)              | 8 (4)                                      | 3 (2)                            |
| <i>PEP Rabies</i>                                   | 5 (1)               | 1 (0.5)                                    | 4 (2.5)                          |
| <i>PEPSE</i>                                        | 2 (0.5)             | 2 (1)                                      | 0 (0)                            |
| <i>Neurological Syndrome</i>                        | 2 (0.5)             | 1 (0.5)                                    | 1 (0.5)                          |
| <i>Drug reaction</i>                                | 1 (0.5)             | 1 (0.5)                                    | 0 (0)                            |
| <b>Advice given by TIDU</b>                         |                     |                                            |                                  |
| <i>Investigations</i>                               | 331 (92)            | 186 (92)                                   | 145 (92)                         |
| <i>Investigations and/or treatment</i>              | 340 (94)            | 192 (95)                                   | 148 (94)                         |
| <i>Infection Consultant advice sought and given</i> | 184 (51)            | 115 (57)                                   | 69 (44)                          |
| <b>Patient Outcome</b>                              |                     |                                            |                                  |
| <i>None</i>                                         | 197 (55)            | 104 (51)                                   | 93 (60)                          |
| <i>TIDU further involvement</i>                     | 115 (32)            | 65 (32)                                    | 50 (32)                          |
| <i>Other hospital/unit further involvement</i>      | 48 (13)             | 36 (17)                                    | 12 (8)                           |

Legend: \*362 patients were discussed but the documentation for two patients did not include any sociodemographic or clinical information, or document by whom the call was received. Therefore, for the purposes of analysis of sociodemographic and clinical features, n=360 \*\*Known to TIDU indicates a patient who was previously under TIDU as an inpatient and/or previously/currently under the care of TIDU as an outpatient. Predominantly, these patients were those known to TIDU because they had accessed care for HIV or viral hepatitis. Of the nine patients with chronic hepatitis, one had chronic hepatitis B and eight had chronic hepatitis C.
